# Supplementary material for: Truncated Isoforms of lncRNA ANRIL Are Overexpressed in Bladder Cancer, But Do Not Contribute to Repression of INK4 Tumor Suppressors
Source: PubMed Central journal article supplement (PMC5932551; doi:10.3390/ncrna1030266), 2015-12-17
Supplement: ncrna-01-00266-s001.pdf [file ncrna-01-00266-s001.pdf]

## Truncated Isoforms of lncRNA ANRIL Are Overexpressed in Bladder Cancer, But Do Not Contribute to Repression of INK4 Tumor Suppressors

Michèle J. Hoffmann, Judith Dehn, Johanna Droop, Günter Niegisch, Christian Niedworok, Tibor Szarvas and Wolfgang A. Schulz

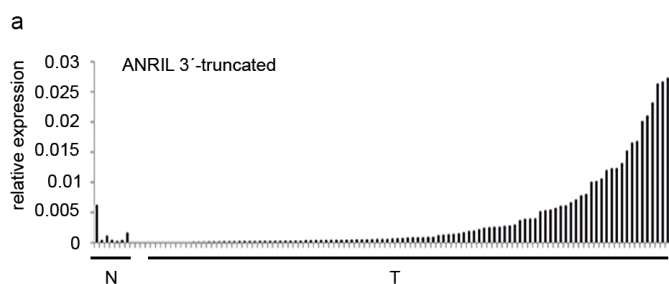

**b**

| Variables         | ANRIL expression |                      |       |
|-------------------|------------------|----------------------|-------|
|                   | n                | median (range)       | P     |
| <b>Age</b>        |                  |                      |       |
| ≤ 65              | 54               | 7.63 (0 - 273.01)    | 0.452 |
| > 65              | 54               | 7.80 (0 - 5178.8)    |       |
| <b>Gender</b>     |                  |                      |       |
| Male              | 79               | 8.12 (0 - 266.54)    | 0.857 |
| Female            | 29               | 6.05 (0 - 5178.7)    |       |
| <b>Stage</b>      |                  |                      |       |
| Ta                | 14               | 9.43 (0 - 5178.7)    |       |
| T1                | 13               | 7.14 (1.01 - 201.27) |       |
| T2                | 17               | 8.57 (0 - 167.97)    |       |
| T3                | 44               | 6.35 (0.26 - 1233.7) |       |
| T4                | 20               | 10.24 (0 - 273.01)   |       |
| Non-inv.          | 27               | 7.14 (0 - 5178.7)    | 0.804 |
| Invasive          | 81               | 8.57 (0 - 1233.7)    |       |
| <b>Grade</b>      |                  |                      |       |
| G1                | 7                | 2.60 (0 - 231.82)    |       |
| G2                | 33               | 5.82 (0 - 5178.7)    |       |
| G3                | 68               | 9.12 (0 - 1233.7)    |       |
| Low-grade (G 1-2) | 40               | 5.06 (0 - 5178.7)    | 0.125 |
| High-grade (G 3)  | 68               | 9.12 (0 - 1233.7)    |       |
| <b>Lyph node</b>  |                  |                      |       |
| N0/Nx/M0/Mx       | 80               | 8.59 (0 - 273.01)    | 0.713 |
| N + / M+          | 28               | 7.31 (0 - 1233.73)   |       |
| <b>Smoking</b>    |                  |                      |       |
| yes               | 61               | 7.14 (0 - 263.39)    | 0.907 |
| no                | 29               | 5.17 (0 - 5178.7)    |       |
| unknown           | 18               |                      |       |
| Control           | 7                | 4.30 (2.09 - 62.36)  | 0.726 |
| Tumor             | 108              | 7.63 (0 - 5178.7)    |       |

**Figure S1.** 3'-truncated ANRIL overexpression in UC tissue set 2 **(a)** 3'-truncated ANRIL isoforms were overexpressed in a second set of UC tissues (T,  $n = 108$ ) compared to normal controls (N,  $n = 7$ ); **(b)** ANRIL expression in relation to clinicopathologic characteristics of UC Set 2.

**Table S1.** Summary of alterations in pRB1 in investigated UC cell lines according to mutation records from the CCLE database ([www.broadinstitute.org/](http://www.broadinstitute.org/)), Hurst *et al.* [32] and own data on protein expression.

| UC cell line | Alteration in pRB1  |
|--------------|---------------------|
| RT-4         | no reported changes |
| BFTC-905     | no reported changes |
| RT-112       | no reported changes |
| SW-1710      | no reported changes |
| J82          | splice site SNP     |
| 5637         | nonsense mutation   |
| 639-V        | nonsense mutation   |
| HT-1376      | nonsense mutation   |
| T-24         | no reported changes |
| UM-UC-3      | no reported changes |
| VM-CUB1      | no reported changes |
| SD           | no reported changes |
| 647-V        | nonsense mutation   |

**Table S2.** Oligonucleotide sequences for named targets. Forward and reverse primer sequences are given in 5' to 3' orientation.

| Target               | Sequence                                                         |
|----------------------|------------------------------------------------------------------|
| ANRIL all            | gcc tca ttc tga ttc aac agc<br>agt act gac tcg gga aag gat tc    |
| ANRIL 3'-truncated   | gct tca ttc tat acc agg atc ca<br>aag cag gta tca ttc tcc tca aa |
| ANRIL 5'- truncated  | gaa ttt tga cag att ggc ttc<br>tct gga ctg tga gac ata gat ttt   |
| ANRIL full length    | gaa ctc cca ggc tca aac c<br>cct tcc ata cca tag tgc gtt ag      |
| TBP                  | aca aca gcc tgc cac ctt a<br>gaa tag gct gtg ggg tca gt          |
| E2F1                 | cct cac cac aga tcc cag c<br>atg ctc cag gag cga gtc g           |
| E2F3                 | acg tet ctt ggt ctg ctc ac<br>tct taa tga ggt gga tgc ct         |
| p14 <sup>ARF</sup>   | gtg gcc ctc gtg ctg atg<br>cag cag ctc cgc cac tc                |
| p15 <sup>INK4B</sup> | gcg ggg act agt gga gaa gg<br>gcc tcc cga aac ggt tga            |
| p16 <sup>INK4A</sup> | caa cgc acc gaa tag tta cg<br>agc acc acc age gtg tc             |
| LIT1                 | ccc tgc tgt gcc ttc agc cc<br>cca ggc tgc ctc acc caa cg         |
| GAPDH                | tcc cat cac cat ctt cca<br>cat cac gcc aca gtt tcc               |
| PVT1                 | ggc cag aag gag att aaa aa<br>atg gtt cca cca gcg tta t          |

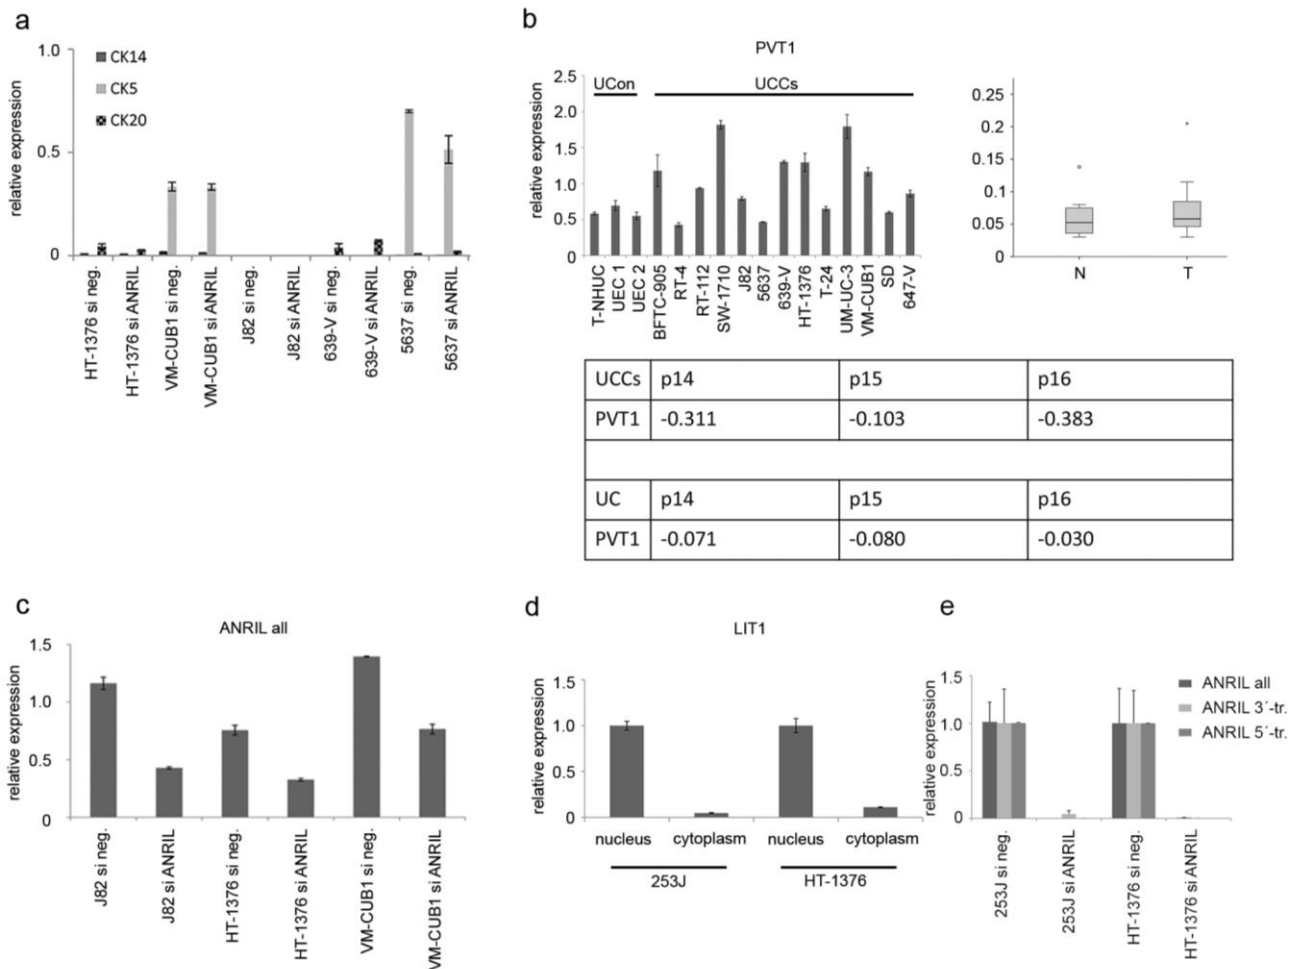

**Figure S2.** Further results from RNA expression analysis. **(a)** Expression levels of the urothelial differentiation markers Cytokeratin (CK) 14, 5 and 20 were determined by qRT-PCR subsequent to siRNA knockdown of ANRIL in five UC cell lines. **(b)** Expression of the lncRNA PVT1 was inversely correlated with that of the three TS in UC cell lines (UCCs) and tissues (UC). Expression of PVT1 was determined by qRT-PCR relative to *TBP* in cell lines (left panel) and tissue sample set 1 (boxplot, right panel). **(c)** Efficiency of ANRIL knockdown in experiments on proliferation activity and senescence induction was checked. **(d)** Purity of nuclear RNA fractions was demonstrated by measuring LIT1 RNA, which is well known to be exclusively localized in the nucleus. **(e)** Despite full length ANRIL also expression of truncated ANRIL isoforms was abolished by siRNA knockdown.
